# Supplementary material
Source: publisher figshare collection journal article supplement (https://gsajournals.figshare.com/articles/dataset/_/13350521)
Supplement: Supplementary file 1 [file 1]

Supplemental material for

**Architectural Mediator subunits are differentially essential for global transcription in *Saccharomyces cerevisiae***

Jason P. Tourigny<sup>\*,1</sup>, Kenny Schumacher<sup>†,‡,§,\*\*,1</sup>, Moustafa M. Saleh<sup>\*</sup>, Didier Devys<sup>†,‡,§,\*\*,1</sup>, Gabriel E. Zentner<sup>\*,††</sup>

<sup>\*</sup>Department of Biology, Indiana University, Bloomington, IN 47405, USA

<sup>†</sup>Institut de Génétique et de Biologie Moléculaire et Cellulaire, 67404 Illkirch, France

<sup>‡</sup>UMR7104, Centre National de la Recherche Scientifique, 67404 Illkirch, France

<sup>§</sup>U964, Institut National de la Santé et de la Recherche Médicale, 67404 Illkirch, France

<sup>\*\*</sup>Université de Strasbourg, 67404 Illkirch, Cedex, France

<sup>††</sup>Indiana University Melvin and Bren Simon Cancer Center, Indianapolis, IN 46202, USA

<sup>1</sup>These authors contributed equally

Contents:

Figures S1-S8

Table S1

Legend for Table S2

Supplemental references

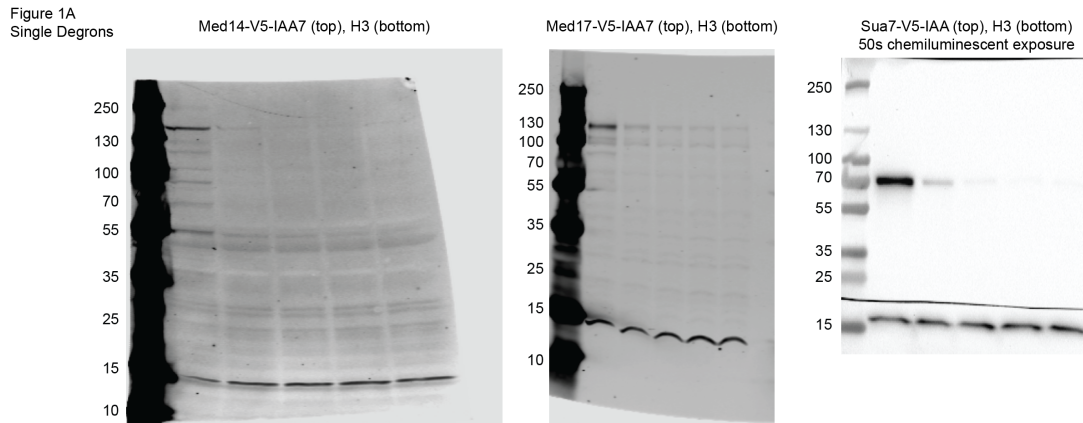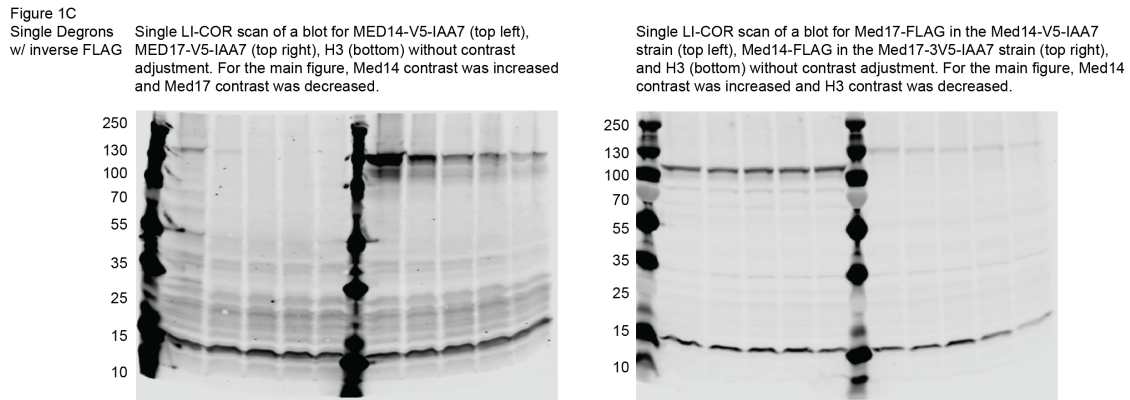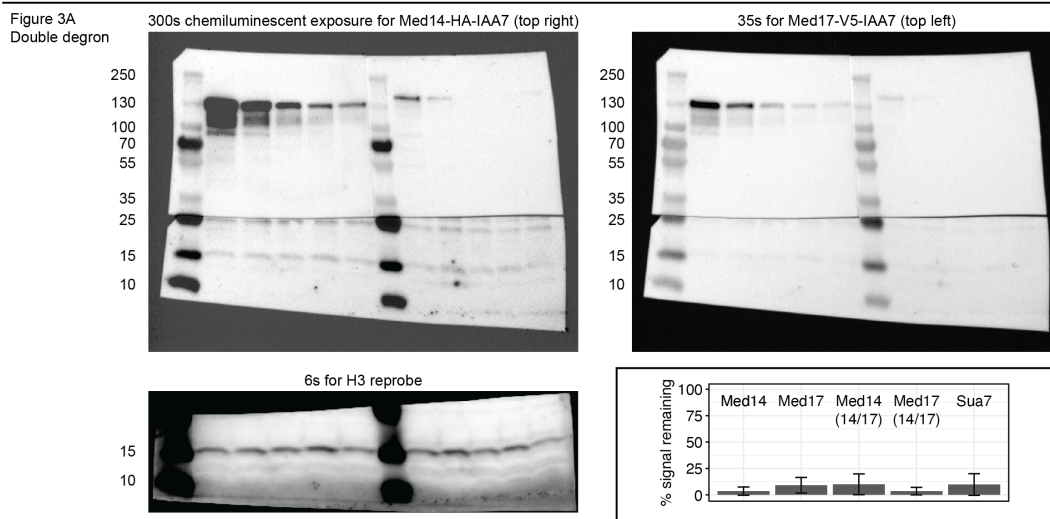

## Figure S1. Full western blot scans

Shown at the bottom right of the figure is a barplot of quantification of western blot signal (mean + SD) for the indicated AID-tagged protein following 30 min 3-IAA treatment (14/17 indicates that the protein was quantified in the dual Med14/17-AID strain). We performed two replicates apiece for the single-degdon strains (Figure 1A), the degdon/FLAG strains (Figure 1C), and the double-degdon strain (Figure 3A). We considered the single-degdon Mediator and Mediator degdon/FLAG strains together (as they are isogenic save for the FLAG tag) for a total of 4 data points. In all cases, depletion is very efficient, but there is relatively large variability between replicates in some cases due to the difficulty of accurately quantifying low signal.

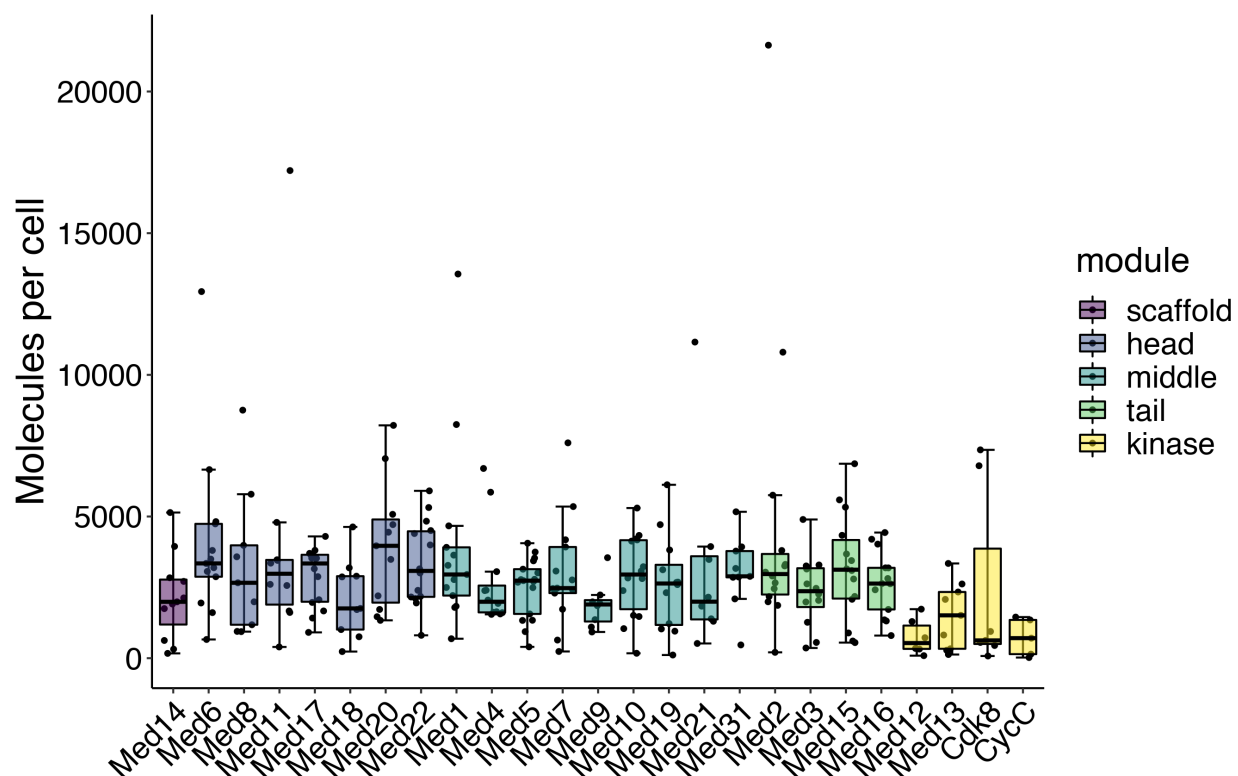

**Figure S2. Comparison of Mediator subunit abundances**

Box and jitter plot displaying molecules per cell for each Mediator subunit from the proteomic studies summarized in (Ho *et al.* 2018). Whiskers represent the smallest and largest values up to  $IQR \times 1.5$ . The median abundances of all head subunits were greater than that of Med14 (2,661 – 3,966 molecules per cell) with the exception of Med18 (1,756 molecules per cell). Three middle subunits (Med4, Med9, and Med21) displayed similar abundances to Med14 (1,895 – 1,994 molecules per cell), while the remainder were present at median levels higher than that of Med14 (2,473 – 2,954 molecules/cell). Tail subunits were present at median abundances greater than Med14 (2,364 – 3,123 molecules per cell), while kinase subunits were less abundant than Med14 (534 – 1,512 molecules per cell).

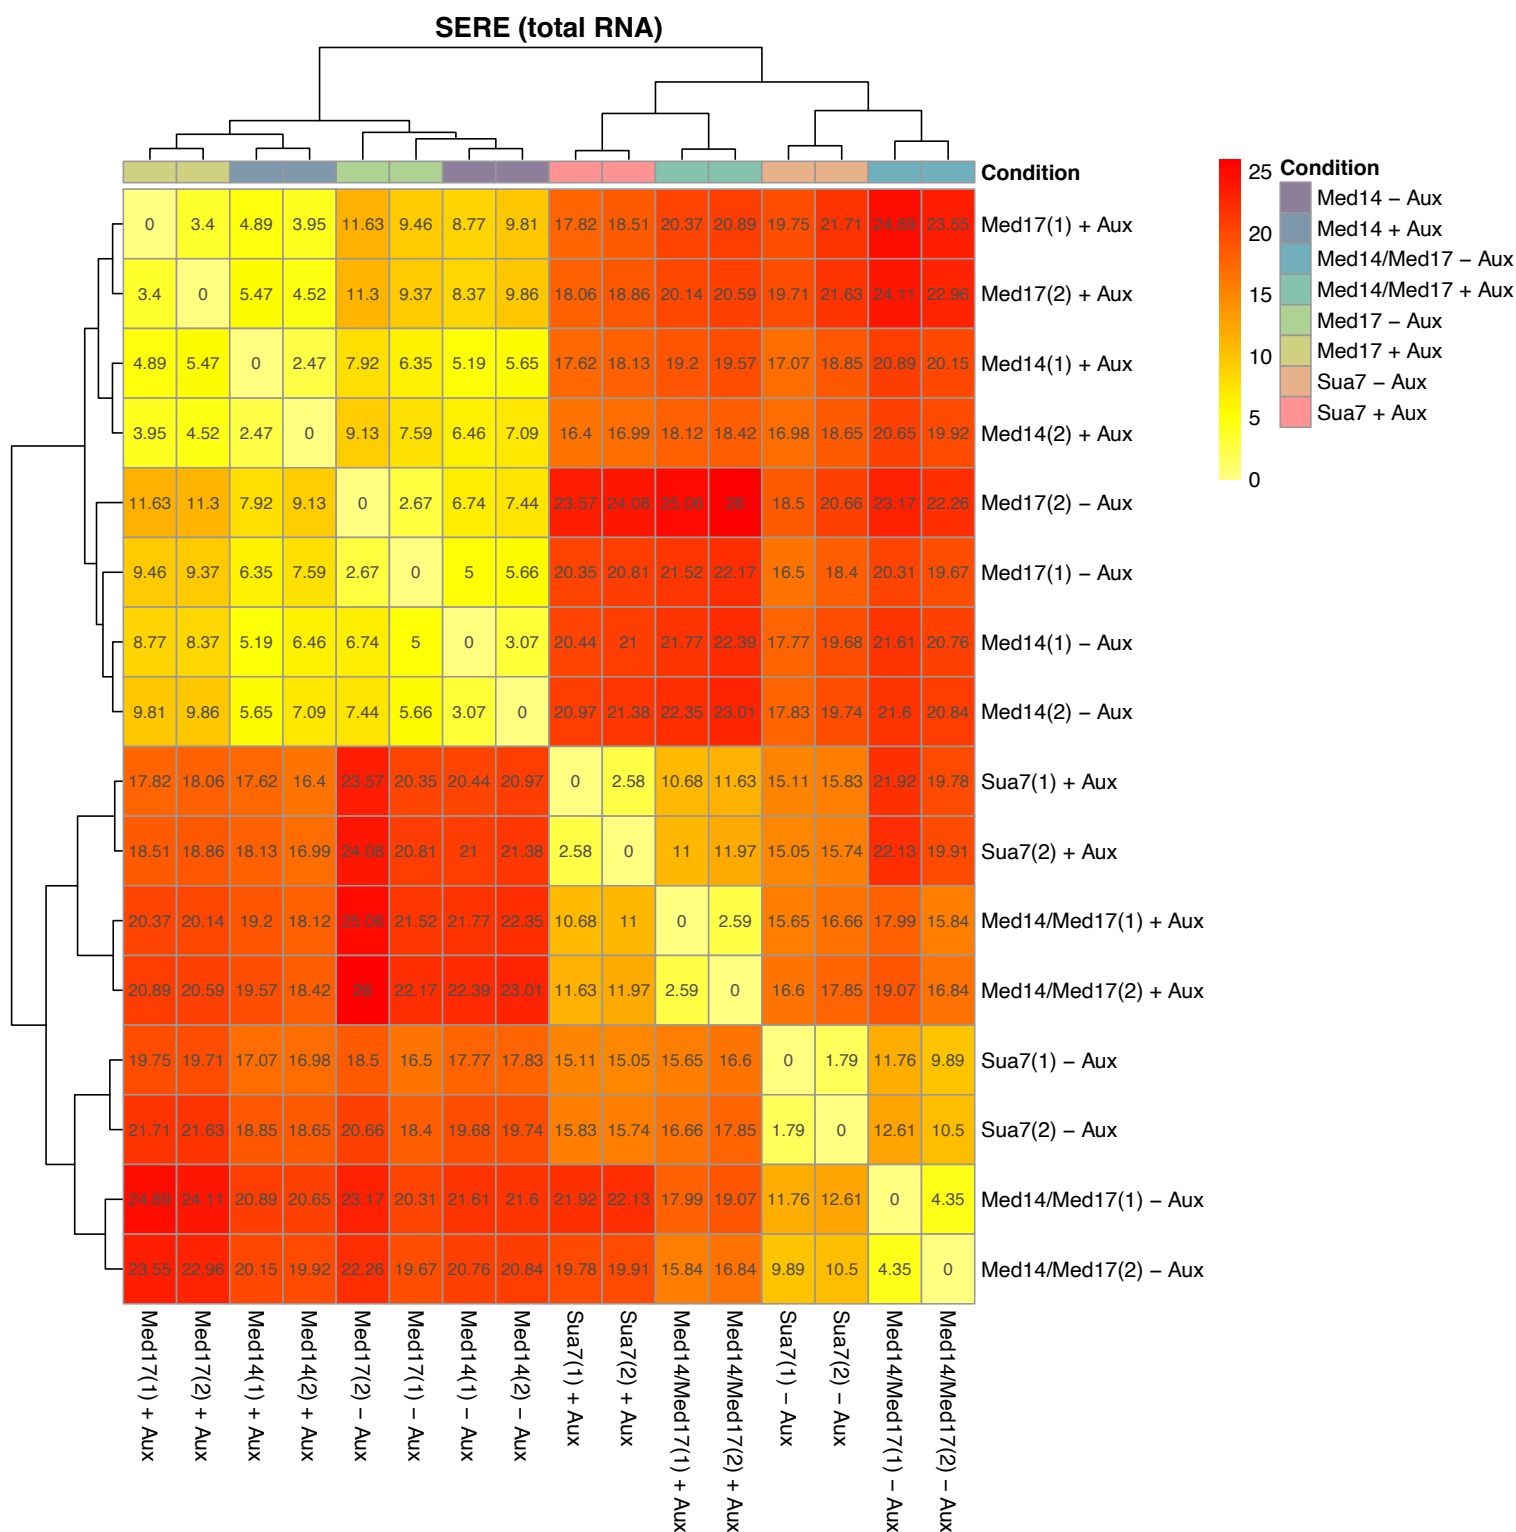

**Figure S3. SERE analysis of total RNA-seq datasets**

Heatmap of SERE values for all total RNA-seq samples analyzed in this study. We note that the Med14-AID and Med17-AID datasets correlate well with one another while the Sua7-AID and Med14/17-AID datasets cluster separately. This is likely due to the different sequencing configurations used for these datasets (see Materials and Methods).

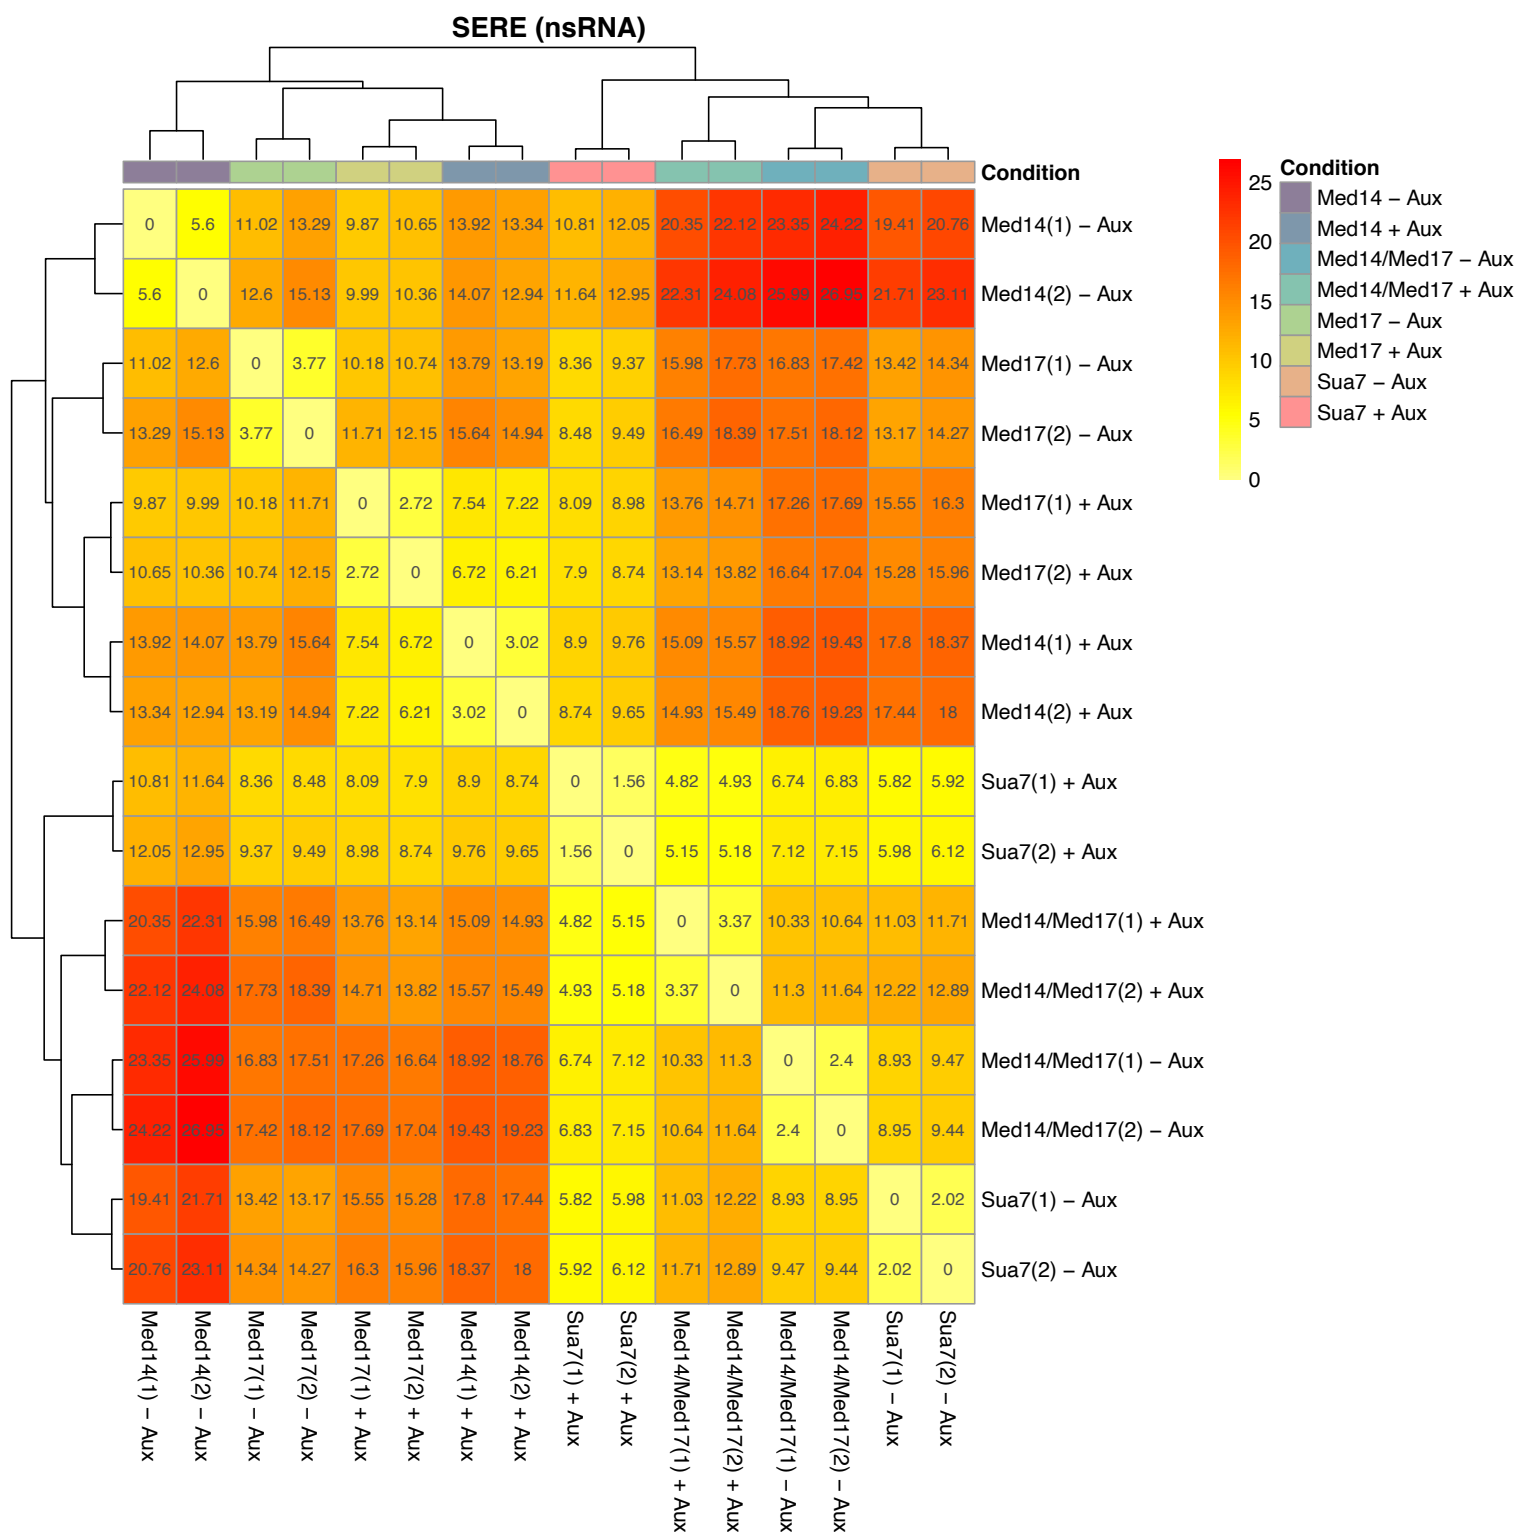

**Figure S4. SERE analysis of 4tU-seq datasets**

Heatmap of SERE values for all 4tU-seq samples analyzed in this study. We note that the Med14-AID and Med17-AID datasets correlate well with one another while the Sua7-AID and Med14/17-AID datasets cluster separately. This is likely due to the different sequencing configurations used for these datasets (see Materials and Methods).

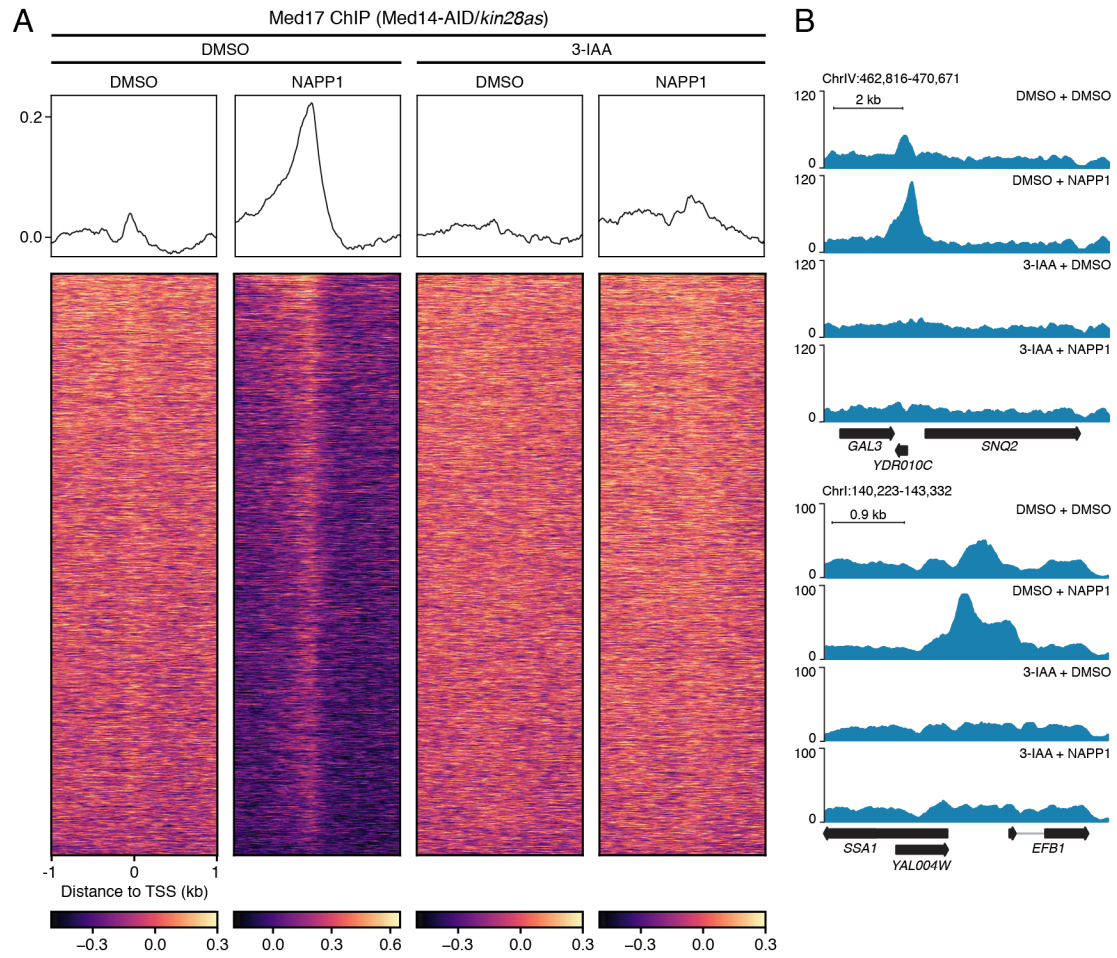

**Figure S5. Med14 depletion removes Med17 from promoters**

(A) Average plots and heatmaps of  $\log_2(\text{Med17-FLAG/no-tag})$  ChIP-seq signal around TSSs following one of the four indicated pre-crosslinking treatments: 15 min DMSO or 500  $\mu\text{M}$  3-IAA followed by 15 min of DMSO or 6  $\mu\text{M}$  NAPP1. (B) Visualization of CPM-normalized Med17 ChIP-seq data for each of the four treatments at two representative regions of the yeast genome.

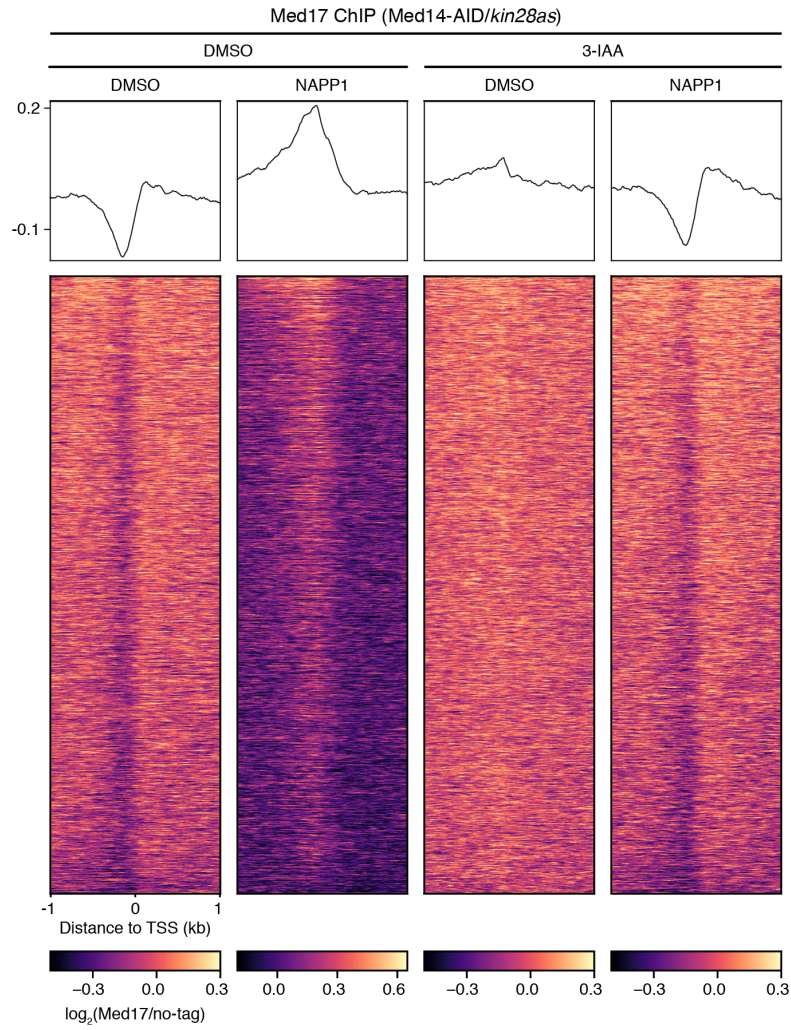

**Figure S6. Med17 ChIP-seq replicate analysis**

Average plots and heatmaps of replicate  $\log_2(\text{Med17/no-tag})$  ChIP-seq signal around TSSs following treatment as in Figure S5.

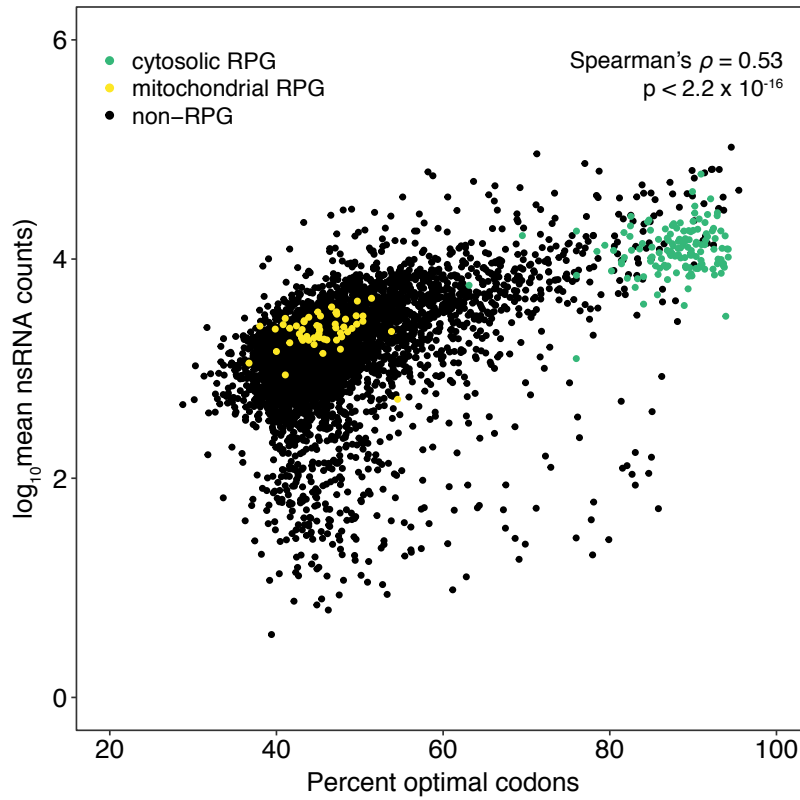

**Figure S7. Comparison of codon optimality and transcription**

Scatterplot comparing the optimal codon percentage and average normalized nsRNA levels of mRNA genes (n = 5,011) across all DMSO-treated samples. Cytosolic and mitochondrial RPGs are highlighted as control gene groups with high and low codon optimality, respectively.

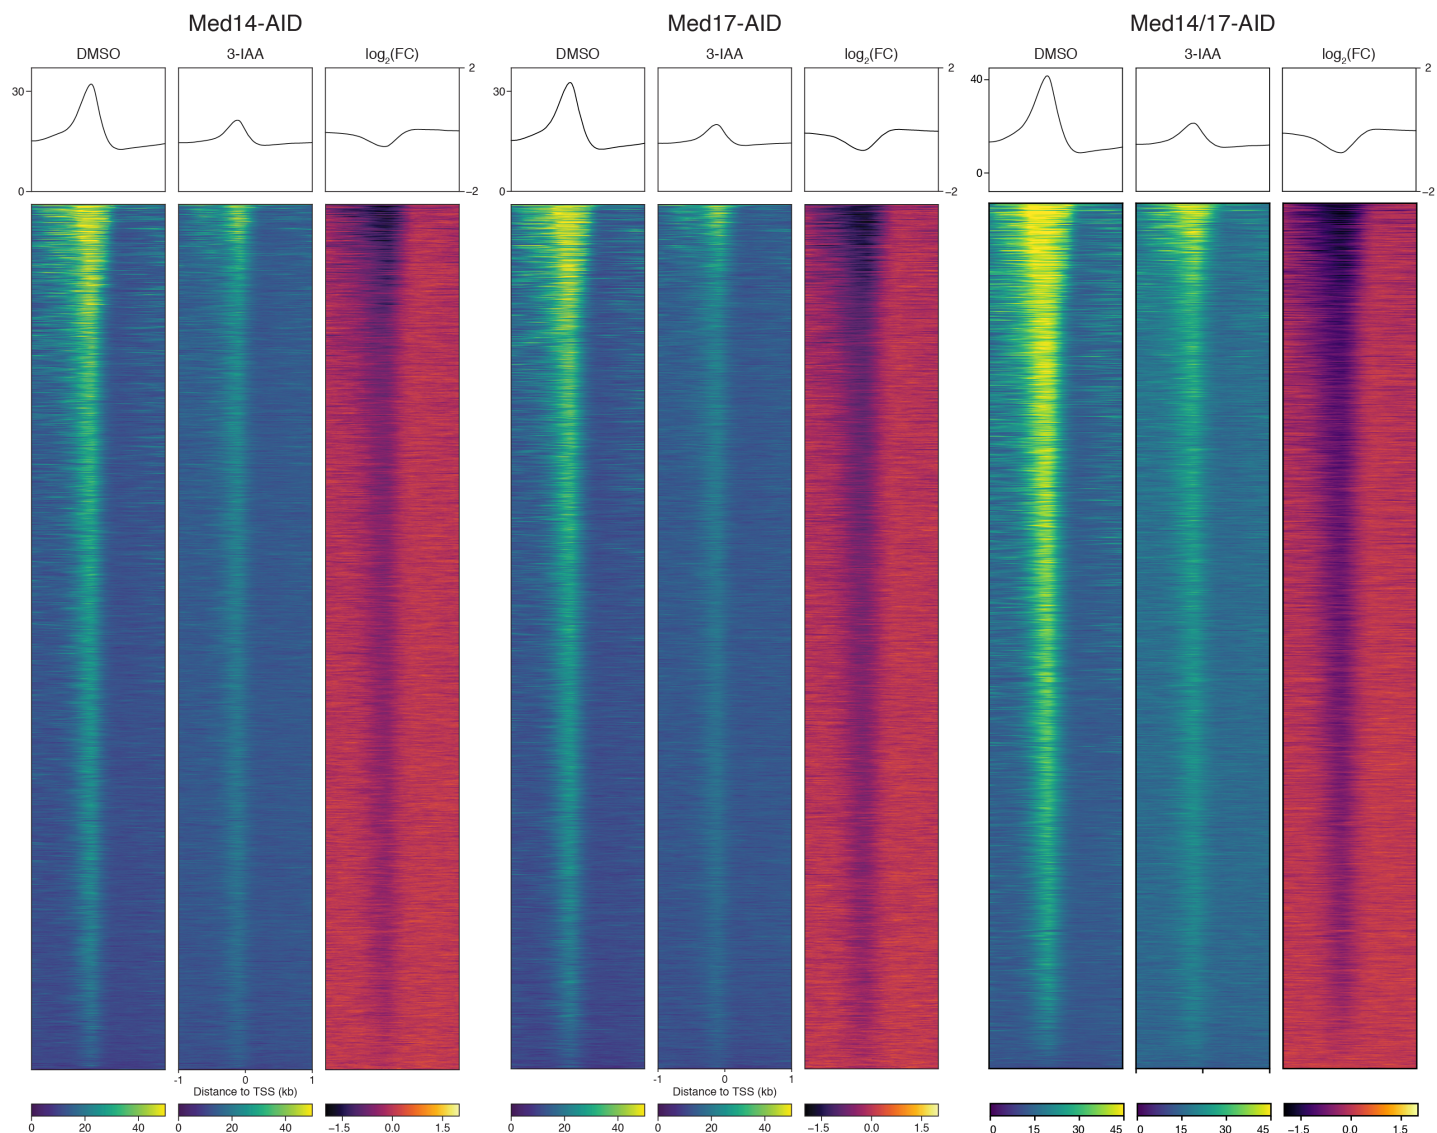

**Figure S8. Sua7 ChIP-seq replicate analysis**

Average plots and heatmaps of replicate Sua7 ChIP-seq signal around TSSs following DMSO or 3-IAA treatment of the indicated strain. An average plot and heatmap of the  $\log_2(3\text{-IAA/DMSO})$  ChIP-seq signal is also shown for each sample.

| Strain                    | Genotype                                                                                                                                                                                                                                      | Source                        |
|---------------------------|-----------------------------------------------------------------------------------------------------------------------------------------------------------------------------------------------------------------------------------------------|-------------------------------|
| DHP43 ( <i>S. pombe</i> ) | <i>h-</i>                                                                                                                                                                                                                                     | D. Devys                      |
| GZY191                    | <i>MAT<math>\alpha</math> ade2<math>\Delta</math>::hisG his3<math>\Delta</math>200 leu2<math>\Delta</math>0 lys2<math>\Delta</math>0 met15<math>\Delta</math>0 trp1<math>\Delta</math>63 ura3<math>\Delta</math>0 his3::pGPD1-OsTIR1-HIS3</i> | (TOURIGNY <i>et al.</i> 2018) |
| GZY219                    | GZY191 <i>MED14-3V5-IAA7-kanMX6</i>                                                                                                                                                                                                           | (TOURIGNY <i>et al.</i> 2018) |
| GZY269                    | GZY191 <i>MED17-3V5-IAA7-kanMX6</i>                                                                                                                                                                                                           | This work                     |
| GZY272                    | GZY269 <i>SUA7-6GLY-3FLAG-hphMX4</i>                                                                                                                                                                                                          | This work                     |
| GZY337                    | GZY219 <i>MED14-6GLY-3FLAG-TRP1</i>                                                                                                                                                                                                           | This work                     |
| GZY341                    | GZY269 <i>MED17-6GLY-3FLAG-TRP1</i>                                                                                                                                                                                                           | This work                     |
| GZY364                    | GZY191 <i>SUA7-3V5-IAA7-kanMX6</i>                                                                                                                                                                                                            | This work                     |
| GZY379                    | <i>his3<math>\Delta</math>1 leu2<math>\Delta</math>0 met15<math>\Delta</math>0 ura3<math>\Delta</math>0 RPB3-TAP::HIS3MX6 kin28as(L83G) leu2::pGPD1-OsTIR1-LEU2 MED14-3HA-IAA7-kanMX6 MED17-6GLY-3FLAG-URA3</i>                               | This work                     |
| GZY380                    | GZY269 <i>MED14-3HA-IAA7-URA3</i>                                                                                                                                                                                                             | This work                     |
| GZY388                    | GZY380 <i>SUA7-6GLY-3FLAG-TRP1</i>                                                                                                                                                                                                            | This work                     |
| GZY425                    | <i>his3<math>\Delta</math>1 leu2<math>\Delta</math>0 met15<math>\Delta</math>0 ura3<math>\Delta</math>0 RPB3-TAP::HIS3MX6 kin28as(L83G) leu2::pGPD1-OsTIR1-LEU2 MED14-3HA-IAA7-kanMX6</i>                                                     | This work                     |

**Table S1. Yeast strains used in this study**

All *S. cerevisiae* strains were constructed in the BY4705 background except for GZY421 and GZY425, which are in the BY4741 background.

**Table S2. Information on total RNA-seq and 4tU-seq results**

This Excel spreadsheet contains mean  $\log_2$ (fold changes), p-values, and adjusted p-values for the 5,080 genes analyzed in total RNA-seq and 4tU-seq experiments. Gene classification information (e.g. coactivator dependence) is also provided.

### Supplemental references

- Ho, B., A. Baryshnikova and G. W. Brown, 2018 Unification of Protein Abundance Datasets Yields a Quantitative *Saccharomyces cerevisiae* Proteome. Cell Systems 6: 192-205.e193.
- Tourigny, J. P., M. M. Saleh, K. Schumacher, D. Devys and G. E. Zentner, 2018 Mediator Is Essential for Small Nuclear and Nucleolar RNA Transcription in Yeast. Mol. Cell. Biol. 38: e00296-00218.
